# Supplementary material for: Impact of Non-Valvular Non-Coronary Concomitant Procedures on Outcomes of Surgical Aortic Valve Replacement in Intermediate Risk Patients
Source: MDPI journal article supplement (doi:10.3390/jcm10235592), 2021-11-28
Supplement: s1 [file s1]

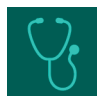

**Table S1:** Multivariate random survival forest

| Variable.                   | Cardiac Mortality | All-Cause Mortality |
|-----------------------------|-------------------|---------------------|
|                             | <i>p</i> -Value   | <i>p</i> -Value     |
| Age, years                  | 0.386             | 0.019               |
| Gender, male                | 0.478             | 0.119               |
| BMI*, kg/m <sup>2</sup>     | 0.668             | 0.648               |
| COPD*                       | 0.516             | 0.38                |
| Diabetes mellitus           | 0.345             | 0.055               |
| Systemic hypertension       | 0.328             | 0.201               |
| Pulmonary hypertension      | 0.118             | 0.175               |
| Preoperative creatinine     | 0.083             | 0.084               |
| Prior myocardial infarction | 0.477             | 0.069               |
| NYHA III-IV                 | 0.127             | 0.056               |
| Urgent/Emergent indication  | 0.218             | 0.002               |
| Logistic EuroSCORE I        | 0.802             | 0.701               |
| EuroSCORE II                | 0.785             | 0.246               |
| STS-PROM                    | 0.045             | 0.476               |
| Ejection fraction <50%      | 0.143             | 0.035               |
| Cross-clamp time            | 0.821             | 0.647               |
| CPB*-time                   | 0.065             | 0.107               |
| Prothesis size              | 0.646             | 0.56                |
| Concomitant SAVR            | 0.01              | 0.003               |

\*BMI=Body mass index; \*COPD=Chronic obstructive pulmonary disease; \*NYHA=New York Heart Association, \*CPB=Cardiopulmonary bypass.
